# Supplementary material for: Pan-active imidazolopiperazine antimalarials target the Plasmodium falciparum intracellular secretory pathway
Source: PubMed Central journal article supplement (PMC7156427; doi:10.1038/s41467-020-15440-4), 2020-04-14
Supplement: 41467_2020_15440_MOESM3_ESM.pdf [file 41467_2020_15440_MOESM3_ESM.pdf]

## Description of Additional Supplementary Files

File Name: Supplementary Data 1

Description: **Complete set of mutations observed in *S. cerevisiae* in vitro resistance evolutions. (Attached Excel Table)** Clone #: The numerical designation for each *S. cerevisiae* GNF179 resistant clone in this study. Chr #: Chromosome # which harbors the identified mutations.
